# Supplementary material for: Analysis of the Reversible Impact of the Chemodrug Busulfan on Mouse Testes
Source: MDPI journal article supplement (doi:10.3390/cells10092403), 2021-09-13
Supplement: s1 [file s1]

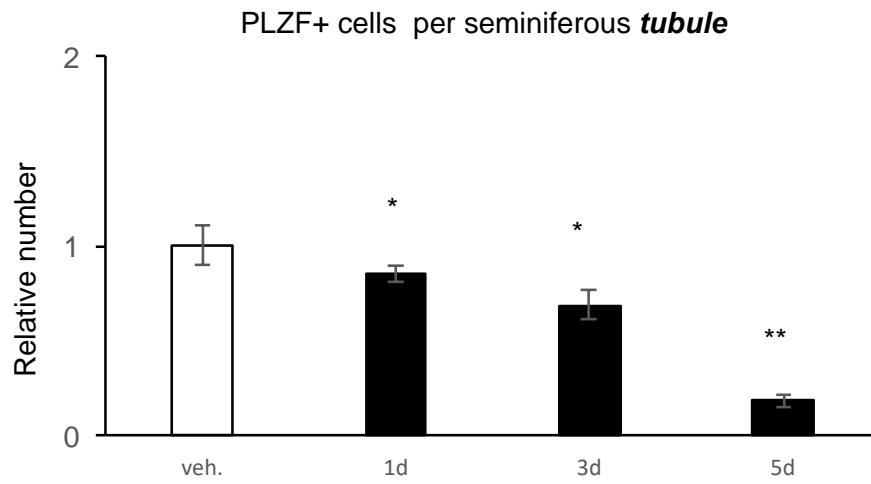

**Figure S1.** Quantification of the relative number of PLZF positive cells per seminiferous tubules in *Wt* testis treated with busulfan (1 to 5 days after treatment). The mean number of PLZF+cells observed in *Wt* males treated with Bu was arbitrarily set at 100 for comparison with the number of G9A+ cells observed one and two weeks after treatment.
