# Supplementary material for: Analysis of the Reversible Impact of the Chemodrug Busulfan on Mouse Testes
Source: Cells. 2021 Sep 13;10(9):2403. doi: 10.3390/cells10092403 (PMC8472455; doi:10.3390/cells10092403)
Supplement: Supplementary file 1 [file cells-10-02403-s001.zip]

Archive with 6 entries (6 files):
- cells-1315888_Supplementary Material/cells-1315888_supplementary material.pdf
- cells-1315888_Supplementary Material/table S4.xlsx
- cells-1315888_Supplementary Material/table S5.xlsx
- cells-1315888_Supplementary Material/TableS3.xlsx
- cells-1315888_Supplementary Material/Thirouard_Tables S1.xlsx
- cells-1315888_Supplementary Material/Thirouard_Tables S2.xlsx
