# Supplementary material for: Analysis of the Reversible Impact of the Chemodrug Busulfan on Mouse Testes
Source: Cells. 2021 Sep 13;10(9):2403. doi: 10.3390/cells10092403 (PMC8472455; doi:10.3390/cells10092403)
Supplement: Supplementary file 1 [file cells-10-02403-s001.zip › cells-1315888_Supplementary Material/table S4.xlsx]

## Sheet: e2f4
Hmgn2
Kif15
Neil3
Cdca3
Mybl2
Nr6a1
Cdc6
Ppp1cc
1700066M21Rik
Cxcr4
Fancd2
Melk
Iqgap3
Gadd45b
Ddx17
Ahdc1
Sugp2
Cdca5
Mki67
Zfp608
Satb1
Aspm
Aen
Rrm2
Kpna2
Slc4a4
Zfp36l1
Dlgap5
Rprm
Fbxo5
Bnc2
Plk4
Cdkn1a
Ppargc1b
Fam72a
Aunip
Ccna2
Smc4
Foxm1
Rad51
Six5
Atp1b1
Adgrl3
Fancb
Sass6
Atp1b2
Setd1b
Cdh23
Mllt6
Aurkb
Tubb5
Nup37
Plk1
Bub1
Rcc1
Rad18
Dbndd2
Kif20a
Nuf2
Gfra1
Dnajc9
Col1a1
Spsb1
Prr5l
Cenpf
Itgb8
Ung
Rtkn2
Rere
Ppm1d
Rapgefl1
Mdm2
Sv2c
5033428I22Rik
Hoxb3
Clspn
Mcm8
Mn1
Dleu2
Poc1a
Tenm4
Pnisr
Cenpa
Ccnf
C430049B03Rik
Tek
Gria3
Ptch1
Trib2
Agap2
Ncaph
Rspo3
Hoxd11
Zmiz1
Nfib
Vcan
Cep55
Dclk2
Slc9a5
Robo3
Bcl9
Zic1
Sema6d
Cenpw
Slc37a2
Bub1b
Apba1
Ndc80
Podn
Dhrs3
Flrt1
Mycn
Magi1
Runx1t1
Cdc25c
Dusp4
Kif2c
Mob3b
Polq
Plekha7
Hnrnph1
Fbxl7
Hmgb2
Kmt2d
Tcf7l2
Fgfr2
Cenph
Espl1
Esco2
Fst
Med12l
Celf2
Esd
Hoxc8
Oip5
Bub3
Incenp
Adgrb2
Pknox2
Sox6
Gas1
Nckap5
Kif4
Alcam
Fchsd2
Rhbdl3
Ikzf2
Tubb2b
Usp13
Prkg1
Tnik
Nav2
Tuba1c
Kif20b
Gtpbp2
Col27a1
Ern1
Epas1
Malat1
Ccr7
Gtse1
Ppp1r9a
Ccsap
Asf1b
Sox5
Trpm3
Igsf9
Ccnb2
Vegfa
Gli2
Kifc1
Tacc1
Stmn1
Alpl
Limk2
D930048N14Rik
Rrbp1
Syt11
Calm2
Syt12
Mapkapk5
Gpsm2
Cenpe
Suv39h2
Cse1l
Ppfibp2
Plekhg5
Col4a2
Kif11
Klf12
Depdc1b
Nudcd2
Ube2c
Pitpnc1
Cenpl
Gas2l3
Kif14
Dock5
2700099C18Rik
Bard1
Stox2
Lamb3
1700003M07Rik
Cdc20
Kifc5b
Mecom
Msantd2
Pianp
Ccnb1
Fmnl1
Zfp365
Kif18b
Cdk1
Dqx1
Scd1
Insig1
Arhgap11a
Brca1
Cdc25b
Ogt
Tubb4b
Depdc1a
Slc25a37
Top2a
Fam212b
Onecut2
Mcam
Traip
Cacna1g
Slit3
Fam46a
Pabpn1
Pi16
Adamtsl1
Pdia4
Mis18bp1
Stk17b
Hyls1
Perp
Il18bp
Spc25
Irf6
Mad2l1
Ier5
Crcp
Prc1
Aff2
Dusp1
Pdgfc
Maml3
Arl5c
Ttk
Trabd2b
Vash1
Tmeff2
Ube2s
Stil
Fam83d
Ttc14
Higd1a
Paxbp1
Prss12
6030458C11Rik
Tpx2
Pygm
Slco5a1
Apoe
Kcnab1
Synpo
2700081O15Rik
Tigit
Pcsk6
Casq2
Nudt8
Asic1
Rmnd1
Gins3
Mmp15
Shcbp1
Abhd10
Fgf13
Clk1
Frat2
Wnt5a
Sema5a
Mns1
Wnk4
Nup210
Gapdh
Adamts2
Kcnip3
Kdm6b
Tet2
Cdkn3
Fam57b
Hoxc5
Ncam1
Rfc4
Cfp
Slc9a3r1
Mmp16
Tuba4a
Ercc6l
Tia1
Smc2
Exo1
BC030867
Ska1
Cd109
Ttf2
Racgap1
Mis18a
Fanci
Ccnt2
Mfsd2a
Mmp17
Pard3b
Arhgef9
Glis2
Slc25a23
Cables1
Cenpi
Acacb
Fa2h
Tnfaip8l1
Trim39
Nek2
Stag3
Ak4
Trim46
Fam193b
Hk2
Pcyt1b
Fgf18
Papln
Trim59
Smpd3
Lrp2
Fras1
Gigyf1
Per3
Kif23
St8sia1
Unc13a
Acot11
Tmtc2
Slc19a2
Plxna4
Gpc6
2900005J15Rik
BC065397
Adgrl1
Snrpb2
Spdl1
Gpr85
Nrp2
Nebl
Ccng1
Rbm47
Prpf39
Fosl1
Slc4a11
Tuba1a
Ypel4
