# Supplementary material for: Analysis of the Reversible Impact of the Chemodrug Busulfan on Mouse Testes
Source: Cells. 2021 Sep 13;10(9):2403. doi: 10.3390/cells10092403 (PMC8472455; doi:10.3390/cells10092403)
Supplement: Supplementary file 1 [file cells-10-02403-s001.zip › cells-1315888_Supplementary Material/table S5.xlsx]

## Sheet: sin3a
Hmgb2
Smc4
Plk1
Cdca3
Ccna2
Nup37
Kif15
Mki67
Neil3
Kif4
Ndc80
Foxm1
Kpna2
Iqgap3
Ddx17
Mybl2
Ppm1d
Bnc2
Cdkn1a
Aspm
Cxcr4
Cep55
Plk4
Kifc1
Kif20a
Ppp1cc
Dlgap5
Setd1b
Epas1
Zfp608
Slc37a2
2700099C18Rik
Bub1b
Rrm2
Aen
Cdc25c
Melk
Oip5
Col27a1
Fancd2
1700066M21Rik
Cenpw
Tcf7l2
Cenpa
Sugp2
Atp1b1
Cenpf
Fbxl7
Sass6
Rtkn2
Tia1
C430049B03Rik
Cdh23
Gas1
Ung
Rad51
Satb1
Ccnb2
Hmgn2
Fst
Smc2
Zfp36l1
Kifc5b
Nuf2
BC030867
Ncaph
Hoxb3
Zic1
Kif2c
Usp13
5033428I22Rik
Aurkb
Gli2
Kif18b
Pard3b
Cdkn3
Prc1
Rcc1
Maml3
Hoxd11
Mrc2
Aunip
Ccnf
Dbndd2
Cdc6
Slc4a4
Cdca5
Hnrnph1
Abhd10
Ppp1r9a
Fam193b
Cdk1
Bub1
Adgrl3
Atp1b2
Fchsd2
Nr6a1
Mmp16
Fgfr2
Kif20b
Mn1
Nckap5
Ccsap
Celf2
Pnisr
Dleu2
Gapdh
Kif23
Prr5l
Fancb
Malat1
Ikzf2
Hoxc8
Med12l
Fbxo5
BC065397
Acot11
Trib2
Trim46
Nfib
Sema6d
Adgrb2
Rprm
Spsb1
Ptch1
Tubb5
Fam72a
Kcnip3
Cenpi
Pknox2
Alcam
Suv39h2
Onecut2
Ttf2
Six5
Trim59
Synpo
Exo1
Mllt6
Shank1
Prkg1
Zmiz1
Mmp15
Mdm2
Ska1
Mcm8
Fmnl1
Magi1
Adora1
Apba1
Mmp17
Gadd45b
Mycn
Robo3
Esco2
Espl1
Fgf18
Rad18
Gigyf1
Pabpn1
Ahdc1
Cenpl
Lrp2
Wt1os
Wnt5a
Col1a1
Runx1t1
Msantd2
Dusp1
Dock5
Dhrs3
Vegfa
Nos1ap
Lrr1
D930048N14Rik
Tnfaip8l1
Gtse1
Ncam1
Ypel4
Atxn1
Fgf13
Tacc1
Irf6
Mfsd2a
Aqp3
9330188P03Rik
Ahr
Rapgefl1
Scd1
Ttk
Spc25
Slc25a37
Itpr1
Rspo3
Gria3
Flrt1
Gpsm2
Sox6
Nfkbiz
Ttc41
Depdc1a
Snx32
Prdx1
Rnf182
Cables1
Gpr85
Mecom
Tmtc2
Sv2c
Slco5a1
Podn
Bcl9
Acacb
Rbm47
Carns1
Arhgap22
Nek2
Nav2
C030037D09Rik
Ank2
Arhgap33
Mfap3l
Rere
Ntng2
Slc25a23
Stox2
Fa2h
Arl6ip1
Dusp4
Clk4
Plxna4
Slc19a2
Fzd4
Asic1
Plekha7
Trim39
Poc1a
Cacna1g
Nebl
Ppargc1b
Fanci
Kif11
Tenm4
4933439C10Rik
Ldlrad3
Stmn1
Dclk2
Esr1
Tubd1
Fam212b
Tubb2b
Agap2
Per2
9230114K14Rik
Unc13a
Glis2
Mob3b
Trabd2b
3110039I08Rik
Incenp
Esd
Tbc1d8
Sox12
Arhgef9
Sfxn5
Sema5a
St8sia1
Ern1
2900005J15Rik
Gpc6
Tek
Kifc2
Gclc
Pdgfc
Tuba1a
Ogt
Immp2l
Racgap1
Mis18a
Smpd3
Igdcc4
Kdm6b
Eml6
Adrb1
Cenpu
Txnrd1
Col4a2
Kmt2d
Vcan
Cd109
Hk2
Zfhx2
Pitpnc1
Lmbr1l
Cd24a
Mns1
Abca1
Itgb8
Ak4
Grhl3
Sgk1
Papln
Rrbp1
Rps3a1
Tmeff2
Mis18bp1
Ap1s2
Fbln5
Ccng1
Lcor
Aff2
Lingo1
Tnik
Gfra1
Pcdhgc4
Slit3
Kmt2c
Msi1
Kif14
Adamts2
Pou6f1
Ccnt2
Lrp1
Pitpnm3
Whrn
Emp1
Clcf1
Il18bp
Stil
Trpm3
Arl5c
Ncapg
Tgfbr3l
Gtpbp2
C330027C09Rik
