# Supplementary material for: Analysis of the Reversible Impact of the Chemodrug Busulfan on Mouse Testes
Source: Cells. 2021 Sep 13;10(9):2403. doi: 10.3390/cells10092403 (PMC8472455; doi:10.3390/cells10092403)
Supplement: Supplementary file 1 [file cells-10-02403-s001.zip › cells-1315888_Supplementary Material/TableS3.xlsx]

## Sheet: Feuil1
Fold Enrichment	Homo sapiens (REF)	upload_1 ( Hierarchy ) NEW! )
GO biological process complete	#	#	expected
spindle assembly involved in female meiosis I	3	3	.11	27.87	+	7.65E-04	4.60E-02
kinetochore organization	19	12	.68	17.60	+	2.11E-10	6.28E-08
mitotic spindle midzone assembly	8	5	.29	17.42	+	5.02E-05	4.54E-03
spindle elongation	8	5	.29	17.42	+	5.02E-05	4.51E-03
mitotic spindle elongation	8	5	.29	17.42	+	5.02E-05	4.49E-03
kinetochore assembly	14	8	.50	15.92	+	4.15E-07	6.13E-05
regulation of attachment of spindle microtubules to kinetochore	13	7	.47	15.01	+	3.04E-06	3.84E-04
protein localization to condensed chromosome	15	8	.54	14.86	+	6.17E-07	8.94E-05
protein localization to kinetochore	15	8	.54	14.86	+	6.17E-07	8.86E-05
spindle assembly involved in meiosis	8	4	.29	13.93	+	5.66E-04	3.61E-02
spindle midzone assembly	12	6	.43	13.93	+	2.20E-05	2.21E-03
negative regulation of mitotic metaphase/anaphase transition	27	13	.97	13.42	+	4.72E-10	1.20E-07
mitotic spindle assembly checkpoint signaling	25	12	.90	13.38	+	2.28E-09	5.15E-07
mitotic spindle checkpoint signaling	25	12	.90	13.38	+	2.28E-09	5.08E-07
spindle assembly checkpoint signaling	25	12	.90	13.38	+	2.28E-09	5.01E-07
protein localization to chromosome, centromeric region	21	10	.75	13.27	+	5.37E-08	8.84E-06
negative regulation of mitotic sister chromatid separation	30	14	1.08	13.01	+	1.39E-10	4.68E-08
CENP-A containing nucleosome assembly	30	14	1.08	13.01	+	1.39E-10	4.58E-08
negative regulation of mitotic sister chromatid segregation	30	14	1.08	13.01	+	1.39E-10	4.48E-08
negative regulation of sister chromatid segregation	30	14	1.08	13.01	+	1.39E-10	4.39E-08
CENP-A containing chromatin organization	30	14	1.08	13.01	+	1.39E-10	4.31E-08
spindle checkpoint signaling	26	12	.93	12.86	+	3.23E-09	6.90E-07
female meiosis I	11	5	.39	12.67	+	1.56E-04	1.24E-02
negative regulation of metaphase/anaphase transition of cell cycle	29	13	1.04	12.49	+	9.39E-10	2.32E-07
centromere complex assembly	38	17	1.36	12.47	+	2.47E-12	9.53E-10
protein K6-linked ubiquitination	9	4	.32	12.39	+	7.95E-04	4.71E-02
negative regulation of chromosome segregation	32	14	1.15	12.19	+	2.72E-10	7.68E-08
negative regulation of chromosome separation	32	14	1.15	12.19	+	2.72E-10	7.54E-08
chromatin remodeling at centromere	33	14	1.18	11.82	+	3.75E-10	1.01E-07
mitotic nuclear membrane disassembly	12	5	.43	11.61	+	2.15E-04	1.60E-02
DNA replication-independent nucleosome assembly	39	15	1.40	10.72	+	2.65E-10	7.77E-08
negative regulation of ubiquitin protein ligase activity	13	5	.47	10.72	+	2.89E-04	2.07E-02
regulation of mitotic sister chromatid segregation	47	18	1.69	10.67	+	4.55E-12	1.71E-09
DNA replication-independent nucleosome organization	40	15	1.44	10.45	+	3.53E-10	9.63E-08
negative regulation of mitotic nuclear division	35	13	1.26	10.35	+	5.86E-09	1.19E-06
regulation of mitotic sister chromatid separation	66	24	2.37	10.13	+	3.14E-15	1.98E-12
regulation of mitotic metaphase/anaphase transition	61	22	2.19	10.05	+	5.15E-14	2.63E-11
DNA damage response, signal transduction by p53 class mediator resulting in transcription of p21 class mediator	14	5	.50	9.95	+	3.82E-04	2.62E-02
regulation of long-term synaptic depression	14	5	.50	9.95	+	3.82E-04	2.61E-02
meiotic spindle organization	14	5	.50	9.95	+	3.82E-04	2.60E-02
microtubule depolymerization	17	6	.61	9.84	+	1.03E-04	8.67E-03
attachment of spindle microtubules to kinetochore	23	8	.83	9.69	+	7.76E-06	8.52E-04
regulation of metaphase/anaphase transition of cell cycle	64	22	2.30	9.58	+	1.15E-13	5.34E-11
mitotic spindle organization	163	56	5.85	9.57	+	8.06E-33	1.42E-29
DNA damage response, signal transduction resulting in transcription	15	5	.54	9.29	+	4.95E-04	3.23E-02
regulation of sister chromatid segregation	73	24	2.62	9.16	+	1.97E-14	1.11E-11
regulation of chromosome separation	73	24	2.62	9.16	+	1.97E-14	1.07E-11
mitotic chromosome condensation	28	9	1.00	8.96	+	3.56E-06	4.43E-04
regulation of ubiquitin protein ligase activity	28	9	1.00	8.96	+	3.56E-06	4.40E-04
microtubule cytoskeleton organization involved in mitosis	184	59	6.60	8.94	+	3.52E-33	6.96E-30
nuclear membrane disassembly	16	5	.57	8.71	+	6.31E-04	3.92E-02
membrane disassembly	16	5	.57	8.71	+	6.31E-04	3.91E-02
female meiotic nuclear division	29	9	1.04	8.65	+	4.52E-06	5.30E-04
mitotic sister chromatid segregation	121	37	4.34	8.52	+	1.21E-20	1.01E-17
mitotic spindle assembly	46	14	1.65	8.48	+	1.25E-08	2.39E-06
histone exchange	46	14	1.65	8.48	+	1.25E-08	2.36E-06
negative regulation of nuclear division	43	13	1.54	8.43	+	4.45E-08	7.64E-06
regulation of chromosome segregation	90	27	3.23	8.36	+	3.00E-15	1.97E-12
spindle organization	224	66	8.04	8.21	+	3.62E-35	8.17E-32
regulation of mitotic cell cycle spindle assembly checkpoint	17	5	.61	8.20	+	7.93E-04	4.75E-02
regulation of spindle checkpoint	17	5	.61	8.20	+	7.93E-04	4.73E-02
regulation of mitotic spindle checkpoint	17	5	.61	8.20	+	7.93E-04	4.71E-02
oocyte maturation	21	6	.75	7.96	+	2.69E-04	1.93E-02
sister chromatid segregation	149	41	5.35	7.67	+	2.63E-21	2.31E-18
metaphase plate congression	59	16	2.12	7.56	+	4.65E-09	9.54E-07
mitotic nuclear division	201	53	7.21	7.35	+	1.85E-26	2.09E-23
mitotic G2 DNA damage checkpoint signaling	35	9	1.26	7.17	+	1.63E-05	1.72E-03
establishment of mitotic spindle localization	35	9	1.26	7.17	+	1.63E-05	1.71E-03
regulation of mitotic nuclear division	110	28	3.95	7.09	+	3.03E-14	1.59E-11
spindle assembly	91	23	3.27	7.04	+	6.83E-12	2.51E-09
mitotic metaphase plate congression	48	12	1.72	6.97	+	8.30E-07	1.15E-04
establishment of chromosome localization	75	18	2.69	6.69	+	2.68E-09	5.81E-07
chromosome segregation	286	67	10.26	6.53	+	1.37E-30	1.96E-27
chromosome localization	77	18	2.76	6.51	+	3.84E-09	8.08E-07
histone phosphorylation	30	7	1.08	6.50	+	2.42E-04	1.75E-02
establishment of mitotic spindle orientation	30	7	1.08	6.50	+	2.42E-04	1.74E-02
regulation of exit from mitosis	43	10	1.54	6.48	+	1.18E-05	1.26E-03
nuclear chromosome segregation	227	52	8.15	6.38	+	1.45E-23	1.44E-20
positive regulation of signal transduction by p53 class mediator	27	6	.97	6.19	+	8.42E-04	4.93E-02
positive regulation of G2/M transition of mitotic cell cycle	27	6	.97	6.19	+	8.42E-04	4.91E-02
mitotic cytokinesis	68	15	2.44	6.15	+	1.47E-07	2.30E-05
regulation of nuclear division	138	30	4.95	6.06	+	1.30E-13	5.69E-11
establishment of spindle orientation	37	8	1.33	6.03	+	1.38E-04	1.11E-02
negative regulation of chromosome organization	79	17	2.83	6.00	+	2.99E-08	5.26E-06
mitotic G2/M transition checkpoint	47	10	1.69	5.93	+	2.32E-05	2.32E-03
chromosome condensation	53	11	1.90	5.78	+	1.12E-05	1.20E-03
cell division	498	102	17.87	5.71	+	6.31E-42	1.99E-38
regulation of meiotic cell cycle	49	10	1.76	5.69	+	3.17E-05	3.05E-03
nuclear division	339	69	12.16	5.67	+	2.70E-28	3.55E-25
mitotic cell cycle checkpoint signaling	159	32	5.71	5.61	+	1.25E-13	5.65E-11
positive regulation of cytokinesis	40	8	1.44	5.57	+	2.21E-04	1.63E-02
spindle localization	56	11	2.01	5.47	+	1.75E-05	1.80E-03
establishment of spindle localization	51	10	1.83	5.46	+	4.27E-05	3.97E-03
organelle fission	369	70	13.24	5.29	+	4.31E-27	5.24E-24
mitotic cell cycle process	675	128	24.22	5.28	+	1.22E-49	6.42E-46
protein localization to chromosome	69	13	2.48	5.25	+	4.58E-06	5.33E-04
sister chromatid cohesion	48	9	1.72	5.23	+	1.39E-04	1.11E-02
DNA replication initiation	43	8	1.54	5.18	+	3.40E-04	2.37E-02
mitotic cell cycle	750	139	26.91	5.17	+	4.86E-53	3.84E-49
G2/M transition of mitotic cell cycle	141	26	5.06	5.14	+	1.35E-10	4.64E-08
cell cycle G2/M phase transition	143	26	5.13	5.07	+	1.77E-10	5.38E-08
ATP-dependent chromatin remodeling	77	14	2.76	5.07	+	2.86E-06	3.68E-04
cell cycle checkpoint signaling	188	34	6.75	5.04	+	3.15E-13	1.31E-10
meiotic chromosome segregation	89	16	3.19	5.01	+	6.47E-07	9.22E-05
regulation of ubiquitin-protein transferase activity	57	10	2.05	4.89	+	9.74E-05	8.32E-03
microtubule cytoskeleton organization	567	99	20.35	4.87	+	1.58E-35	4.16E-32
microtubule polymerization or depolymerization	52	9	1.87	4.82	+	2.36E-04	1.73E-02
meiotic nuclear division	158	27	5.67	4.76	+	2.69E-10	7.74E-08
positive regulation of mitotic cell cycle phase transition	84	14	3.01	4.64	+	7.00E-06	7.79E-04
regulation of cytokinesis	90	15	3.23	4.64	+	3.31E-06	4.16E-04
cytoskeleton-dependent cytokinesis	96	16	3.44	4.64	+	1.57E-06	2.05E-04
DNA damage response, signal transduction by p53 class mediator	79	13	2.83	4.59	+	1.67E-05	1.74E-03
cytokinesis	98	16	3.52	4.55	+	2.00E-06	2.59E-04
mitotic DNA integrity checkpoint signaling	123	20	4.41	4.53	+	1.14E-07	1.84E-05
chromosome organization involved in meiotic cell cycle	68	11	2.44	4.51	+	8.46E-05	7.35E-03
interstrand cross-link repair	56	9	2.01	4.48	+	3.85E-04	2.61E-02
mitotic DNA damage checkpoint signaling	119	19	4.27	4.45	+	3.03E-07	4.57E-05
centrosome cycle	88	14	3.16	4.43	+	1.12E-05	1.20E-03
positive regulation of cell cycle process	228	36	8.18	4.40	+	2.20E-12	8.71E-10
meiotic cell cycle process	172	27	6.17	4.37	+	1.41E-09	3.34E-07
mitotic cell cycle phase transition	262	41	9.40	4.36	+	8.30E-14	3.97E-11
DNA damage response, signal transduction by p53 class mediator resulting in cell cycle arrest	58	9	2.08	4.32	+	4.85E-04	3.19E-02
cell cycle process	957	146	34.34	4.25	+	1.32E-46	5.20E-43
cell cycle phase transition	270	41	9.69	4.23	+	2.01E-13	8.57E-11
signal transduction by p53 class mediator	119	18	4.27	4.22	+	1.25E-06	1.67E-04
positive regulation of cell cycle phase transition	107	16	3.84	4.17	+	5.49E-06	6.33E-04
anaphase-promoting complex-dependent catabolic process	87	13	3.12	4.16	+	4.13E-05	3.86E-03
collagen metabolic process	61	9	2.19	4.11	+	6.72E-04	4.12E-02
DNA integrity checkpoint signaling	150	22	5.38	4.09	+	1.36E-07	2.15E-05
nucleosome assembly	117	17	4.20	4.05	+	3.98E-06	4.84E-04
mitotic G1 DNA damage checkpoint signaling	70	10	2.51	3.98	+	4.32E-04	2.89E-02
regulation of cyclin-dependent protein serine/threonine kinase activity	98	14	3.52	3.98	+	3.30E-05	3.14E-03
regulation of G2/M transition of mitotic cell cycle	212	30	7.61	3.94	+	1.58E-09	3.66E-07
mitotic G1/S transition checkpoint signaling	71	10	2.55	3.93	+	4.78E-04	3.16E-02
DNA damage checkpoint signaling	142	20	5.10	3.93	+	8.87E-07	1.22E-04
microtubule organizing center organization	100	14	3.59	3.90	+	4.03E-05	3.79E-03
cell cycle	1316	184	47.22	3.90	+	1.44E-54	2.28E-50
regulation of cell cycle G2/M phase transition	222	31	7.97	3.89	+	1.12E-09	2.73E-07
microtubule-based process	806	112	28.92	3.87	+	3.87E-32	6.12E-29
DNA packaging	202	28	7.25	3.86	+	8.28E-09	1.60E-06
meiosis I	123	17	4.41	3.85	+	7.24E-06	8.00E-04
signal transduction in response to DNA damage	167	23	5.99	3.84	+	1.96E-07	3.01E-05
retina homeostasis	80	11	2.87	3.83	+	3.05E-04	2.16E-02
meiotic cell cycle	233	32	8.36	3.83	+	8.78E-10	2.20E-07
regulation of cyclin-dependent protein kinase activity	102	14	3.66	3.83	+	4.89E-05	4.50E-03
nuclear membrane organization	73	10	2.62	3.82	+	5.82E-04	3.66E-02
meiosis I cell cycle process	125	17	4.49	3.79	+	8.77E-06	9.56E-04
female gamete generation	136	18	4.88	3.69	+	6.75E-06	7.63E-04
nuclear envelope organization	84	11	3.01	3.65	+	4.44E-04	2.96E-02
viral transcription	116	15	4.16	3.60	+	4.95E-05	4.50E-03
negative regulation of mitotic cell cycle phase transition	240	31	8.61	3.60	+	5.99E-09	1.20E-06
double-strand break repair via homologous recombination	101	13	3.62	3.59	+	1.61E-04	1.27E-02
DNA conformation change	312	40	11.20	3.57	+	4.53E-11	1.59E-08
transport across blood-brain barrier	86	11	3.09	3.56	+	5.31E-04	3.44E-02
DNA geometric change	110	14	3.95	3.55	+	1.02E-04	8.62E-03
regulation of mitotic cell cycle phase transition	434	55	15.57	3.53	+	1.44E-14	8.42E-12
vascular transport	87	11	3.12	3.52	+	5.80E-04	3.67E-02
recombinational repair	103	13	3.70	3.52	+	1.92E-04	1.48E-02
collagen fibril organization	103	13	3.70	3.52	+	1.92E-04	1.47E-02
regulation of cell division	175	22	6.28	3.50	+	1.44E-06	1.89E-04
positive regulation of cell division	88	11	3.16	3.48	+	6.32E-04	3.90E-02
positive regulation of mitotic cell cycle	112	14	4.02	3.48	+	1.21E-04	9.93E-03
DNA duplex unwinding	105	13	3.77	3.45	+	2.28E-04	1.68E-02
positive regulation of cell cycle	310	38	11.12	3.42	+	4.43E-10	1.15E-07
negative regulation of cell cycle phase transition	294	36	10.55	3.41	+	1.31E-09	3.15E-07
regulation of cell cycle phase transition	522	63	18.73	3.36	+	1.27E-15	8.74E-13
regulation of DNA replication	108	13	3.88	3.35	+	2.93E-04	2.09E-02
regulation of signal transduction by p53 class mediator	201	24	7.21	3.33	+	1.11E-06	1.50E-04
negative regulation of G2/M transition of mitotic cell cycle	109	13	3.91	3.32	+	3.18E-04	2.24E-02
negative regulation of mitotic cell cycle	294	35	10.55	3.32	+	4.32E-09	8.99E-07
cotranslational protein targeting to membrane	101	12	3.62	3.31	+	5.51E-04	3.56E-02
negative regulation of cell cycle G2/M phase transition	111	13	3.98	3.26	+	3.73E-04	2.57E-02
negative regulation of cell cycle process	368	42	13.20	3.18	+	3.91E-10	1.03E-07
regulation of chromosome organization	290	33	10.41	3.17	+	3.22E-08	5.59E-06
regulation of cell cycle process	792	90	28.42	3.17	+	2.15E-20	1.70E-17
chromatin assembly	150	17	5.38	3.16	+	7.22E-05	6.34E-03
double-strand break repair	204	23	7.32	3.14	+	4.45E-06	5.29E-04
regulation of mitotic cell cycle	588	66	21.10	3.13	+	6.25E-15	3.80E-12
nucleosome organization	156	17	5.60	3.04	+	1.12E-04	9.26E-03
cytoplasmic translation	122	13	4.38	2.97	+	8.41E-04	4.94E-02
DNA replication	273	29	9.80	2.96	+	7.99E-07	1.13E-04
chromatin assembly or disassembly	170	18	6.10	2.95	+	9.95E-05	8.45E-03
protein-DNA complex assembly	256	26	9.19	2.83	+	6.18E-06	7.03E-04
cytoskeleton organization	1212	123	43.49	2.83	+	7.18E-24	7.56E-21
response to ionizing radiation	148	15	5.31	2.82	+	5.61E-04	3.59E-02
negative regulation of cell cycle	454	46	16.29	2.82	+	1.91E-09	4.37E-07
regulation of cell cycle	1164	117	41.77	2.80	+	2.24E-22	2.09E-19
DNA recombination	225	21	8.07	2.60	+	1.42E-04	1.13E-02
peptidyl-serine phosphorylation	185	17	6.64	2.56	+	6.96E-04	4.23E-02
protein-DNA complex subunit organization	296	27	10.62	2.54	+	3.49E-05	3.30E-03
response to toxic substance	244	22	8.76	2.51	+	2.37E-04	1.73E-02
negative regulation of organelle organization	334	28	11.98	2.34	+	1.06E-04	8.84E-03
vascular process in circulatory system	251	21	9.01	2.33	+	6.16E-04	3.85E-02
regulation of protein serine/threonine kinase activity	493	41	17.69	2.32	+	2.98E-06	3.79E-04
microtubule-based movement	354	29	12.70	2.28	+	9.36E-05	8.04E-03
establishment of organelle localization	398	32	14.28	2.24	+	4.93E-05	4.51E-03
chromosome organization	1064	85	38.18	2.23	+	3.70E-11	1.33E-08
DNA repair	531	42	19.05	2.20	+	6.80E-06	7.62E-04
cellular response to DNA damage stimulus	793	62	28.45	2.18	+	4.80E-08	8.16E-06
organelle assembly	796	62	28.56	2.17	+	5.14E-08	8.56E-06
positive regulation of transferase activity	693	53	24.87	2.13	+	1.04E-06	1.42E-04
extracellular matrix organization	383	29	13.74	2.11	+	3.19E-04	2.24E-02
organelle localization	609	46	21.85	2.11	+	6.04E-06	6.92E-04
extracellular structure organization	384	29	13.78	2.10	+	3.28E-04	2.29E-02
external encapsulating structure organization	386	29	13.85	2.09	+	3.48E-04	2.41E-02
regulation of transferase activity	1033	76	37.07	2.05	+	1.50E-08	2.78E-06
positive regulation of protein kinase activity	539	39	19.34	2.02	+	7.30E-05	6.37E-03
regulation of protein kinase activity	802	58	28.78	2.02	+	1.36E-06	1.80E-0
