# Supplementary material for: Analysis of the Reversible Impact of the Chemodrug Busulfan on Mouse Testes
Source: Cells. 2021 Sep 13;10(9):2403. doi: 10.3390/cells10092403 (PMC8472455; doi:10.3390/cells10092403)
Supplement: Supplementary file 1 [file cells-10-02403-s001.zip › cells-1315888_Supplementary Material/Thirouard_Tables S1.xlsx]

## Sheet: S1a-1
Scd1	Gm11400	Alpl	Serpinf1	Atp6v0c	Gm44667	Gm42876
Il1rn	Slc2a4rg-ps	Ing4	Hnrnph1	Tnik	Gm45632	Gm43327
Naaladl2	Gm12940	Fgf21	Fnbp4	Sorcs2	Gm45250	Hk2
Adgrl3	Gdap10	L1cam	Glis2	Plxna4	AC160637.1	Slc4a3
Sox5	2610037D02Rik	Adgrg1	Ahr	St8sia1	Gm47260	Esr1
Prkg1	Gm42664	Amt	Clk4	Plxna3	Gm49284	Itgb3
Immp2l	Gm43128	Catsper2	Limk2	Pygm	Gm49204	Cygb
Angptl7	Gm35339	Adora1	Rapgef3	Unc13a	AC105358.1	Nxnl2
Ung	9930017N22Rik	Lrrn4	Clcn2	Tmtc2	Lama4	Gfra1
Ptprm	AC154232.2	Cfap46	Gtpbp2	Adamts2	Klhl29	Itgb8
Gpc6	Asic1	4732471J01Rik	Atat1	Fgf1	Slc17a9	Nkain4
Gas7	Agap2	Izumo4	Arhgef9	Arl5c	Gabbr1	Mmp16
Mgp	Zfr2	Fam57b	Tmeff2	Atp5l	Apba1	Nup210
Kifc2	Zcchc7	Snora2b	Rassf8	Zdhhc1	Plce1	Lctl
Col20a1	Pitpnm3	Celsr2	Fgfr2	Cdh18	Nrp2	Nktr
Cacna1g	Gapdh	4933439C10Rik	Ankrd10	Arglu1	2002-09-01	Igdcc4
Vdr	Trabd2b	Wt1os	6430548M08Rik	Tet2	Dclk2	Ank2
Cd200	Snhg17	1700020D05Rik	Hyou1	Adamts3	Per3	Wnk4
Fa2h	Malat1	Gm49396	Gmip	2900005J15Rik	Pcsk6	Ints6l
Flrt1	Pdzd2	Muc16	Nod1	Adgrd1	Tenm3	Arhgap26
Kcnq3	Podxl	Gm20219	Gcnt1	Rnf182	Ulk3	Spred3
Megf6	Smpd3	AC122335.1	Spns2	Tenm4	Loxl1	Tgm2
Zfp773	mt-Nd6	AC162302.2	Atp1b2	Lingo1	Pknox2	Ccr7
1700001L05Rik	Ckmt1	Rrnad1	Ppp1r3b	Pard3b	Csgalnact1	Camk4
Sbk3	Ttc22	Anxa9	Prdm9	Slit3	Gtdc1	Ak5
AI480526	Med12l	P4ha2	Haghl	Hmcn1	Stox2	Ncam1
Gm37893	Gm28151	Col6a2	Msln	Dnm3os	Kazn	Plekhg5
Adgrb2	Rnf112	Nid2	Rab44	Airn	Atxn1	Six5
Spag1	Slc22a17	6030458C11Rik	Tia1	Prkcg	Sox6	Kif21b
Fzd4	Usp53	Ly6f	Emc1	B930095G15Rik	D930048N14Rik	Nemp2
Il33	Abca9	Paxbp1	Sema5a	Wipf3	Gas1	Eml6
Rspo1	Fbxl7	Krt7	Adamtsl1	Gm15675	Slc4a4	Ttc41
Fras1	Snx32	Wfdc1	3110039I08Rik	4933407K13Rik	Maml3	Magi1
Csdc2	5430430B14Rik	Vegfa	Gm21781	2900089D17Rik	Zfp467	Gpr68
Kcnb1	Susd2	Ikzf2	Gm20342	Neat1	Olfr1372-ps1	Gli2
Fbln5	Rhbdl3	Ccnt2	Gm20045	Gm29666	Ube2i	Nckap5
Adamts20	Lcor	Sema6d	Gm44200	Gm28941	Cacnb1	Zfp579
Extl1	Slco5a1	Ccnl1	Xylt1	Gm38057	Pabpn1	Xkr4
Tmem108	Rnft2	Plxnb3	Col4a4	Gm36936	Npff	Nav2
Col8a2	Plekha7	Car12	Alcam	Gm36989	Adamts10	Tln2
Mir22hg	Fgf18	Zfc3h1	Sorcs1	6430511E19Rik	Gpc2	Grk4
Zfp950	Pisd-ps1	Sv2a	Dhrs3	A930004J17Rik	Gabre	Nebl
Slc1a2	Dennd6b	Gjb3	Cfp	Gm38253	Igsf9	Slc8a1
Tnfrsf25	Ager	Synpo	Hoxc8	Gm38372	Fam227a	Ppp4r1l-ps
Slc27a3	Rac3	Il17re	Apoe	Gm37206	Kcp	Syngap1
Prss12	Adcy1	Zbtb37	Aqp1	Gm38248	Actg1	Msi2
Ttll3	Dnase1l2	Sv2c	1700109H08Rik	Gm42979	Grid2	Prob1
Leng8	Mapk8ip3	Dock8	Matn4	Gm43759	Tgfbr3l	Mob3b
Atp8a1	Nudt8	Ggcx	Hoxc5	Gm43300	Pla2g4b	Carns1
Ankrd16	Lrp2	Dleu2	Pcdhgc4	Gm43059	Gm37261	Nrbp2
Il18bp	Pnisr	Zc3h11a	Sfi1	Gm42549	Gm37963	Smim1
Spaca6	Pdzk1ip1	9330188P03Rik	Slc25a27	Gm44597	Gm42913	C430049B03Rik
D430040D24Rik	Pi16	Gm16574	Eno2	Dennd4b	Slc16a3	Rere
Gm17491	Rgs11	Gm17024	Pdk1	Hoxd11	Mbd6	Spsb1
5033428I22Rik	Mamdc4	Mir5125	Runx1t1	Cilp2	Pdia4	Zfhx2
Slc1a5	Grin1	Gm26546	Dqx1	Insig1	Clk1	Cables1
Celf2	Adam33	Gm26786	Taz	Trim39	Pfkfb2	Tspyl2
Ppp1cc	Mfsd2a	Gm26890	Slc9a5	Col27a1	Atp1b1	Cacna2d4
Chrd	Tekt2	Gm16754	Dbndd2	Ankrd34a	Rrbp1	Bicdl1
Nfib	Morn1	Gm28043	Tnfsfm13	Sox12	Fam210b	Acacb
Appl2	Ccnl2	Gm28119	Pfkl	Trpm3	Mecom	Msantd2
Trib2	Mapkapk5	Gm28730	Lpin1	Zfp608	Olfml3	Zmym6
Epas1	Tbx6	Gm37968	Mrc2	2700081O15Rik	Pdgfc	4632404H12Rik
Col5a1	Gdpd3	Gm37795	Vash1	Msi1	Bnc2	Safb2
Kcnab1	Cox6a2	Gm37154	Hhipl1	Ankrd24	Podn	Trim46
Itpr1	Cngb1	Gm38319	Fam193b	Ddx17	Slc2a1	Upk3b
Psd3	Ppp1r9a	Gm37309	Sla	Zfp607b	Mthfr	Ccdc84
Fchsd2	Inha	Gm37274	Chkb	Rnf213	Clcn6	Als2cl
Aff2	Ssc5d	Gm38220	Thpo	Mn1	Gm996	Dock5
Prr5l	Rsrp1	Gm38020	Lmbr1l	Kcnip3	Col1a2	Krt14
Arhgap39	Pkhd1l1	Gm38077	Amhr2	Tnfsf13os	Adamts9	Onecut2
Evpl	Shank1	Gm43858	Satb1	Gm38394	Pianp	Slc25a23
Acot11	Prelp	Gm43511	Map4k2	Ptprv	Rhpn2	Vat1l
Rapgefl1	Fam129c	Gm43413	Pcyt2	Xndc1	Abcd1	Khnyn
Mllt6	Exoc3l	Gm43445	Cfh	Pcdhga5	Col4a2	Kmt2d
Nos1ap	Casc1	Gm43071	Ttc14	Gmpr	Plpp5	Hoxb3
Col16a1	Sh2d5	Gm42603	Epb41l4b	Col1a1	Slc27a1	Asap2
Plekha6	Smtnl2	Gm36535	Ak4	Grik5	Fam46a	Plxnb1
Igsf3	Rimkla	Gm43080	Mmp17	Crtc1	Man2c1	Usp13
Nrep	Krt9	Gm43513	Gigyf1	Gys1	Adamts7	Kmt5c
Rnf150	Mpp3	Gm43328	Dmpk	Stx1a	Zic1	Rpl3
Ldlrad3	Lgals4	Gm43693	Myo7a	Zmiz1	Nphp3	Nr6a1
Mical3	Cpa1	Gm42820	Kifc3	Vav2	Mst1r	Tacc1
Phactr1	9130017K11Rik	Gm43029	Jak3	Pou6f1	Abcc10	Sptbn2
Klf12	Rnf207	Gm43481	Tnxb	Adgrl1	Lss	Clk2
D030028A08Rik	Clasrp	Gm43747	Sfxn5	Lama5	Szt2	Rbm47
P2rx3	Vmn1r13	Gm42572	Ppargc1b	Aldoc	Stard9	Apcdd1
Il16	Ankrd23	Gm42732	Ypel4	Kdm6b	Zfp446	Wdr90
Syn3	Selenbp1	Gm44243	Tspoap1	Rmnd1	Ogt	Ptar1
Gm37376	Acrbp	Gm45838	Adrb1	Tns3	Slc25a37	6330403L08Rik
Papln	4930518I15Rik	Gm45221	Nat14	Ern1	Sirt6	Bnip3
Aldh1l2	Pdzd7	Gm9856	Nfkbiz	Slc9a3r1	Tet3	Rab10os
Mylk	Gm2420	Gm47963	Crb2	Usp43	Pcyt1b	Gm2415
Fam151a	Gm9164	Gm47113	Zfp57	Zfp36l1	Ror1	Gm7694
Fmnl1	Gm5466	Gm47483	Ppfibp2	Srsf5	Ntng2
Per2	Gm15344	Gm33869	Arhgap33	Abcd4	Aldh1b1
Gm38391	Gm15337	Gm47583	Mycn	Ptch1	Prpf39
Srpk3	Firre	Gm47585	Bcl9	Pde4d	Sugp2
Rpl10	Gm15513	Gm47798	Angptl6	Hmbox1	Stag3
Cdh23	Chn1os3	Gm49223	Whrn	Wnt5a	Uvssa
Kpna2	BC065397	AC133488.1	Lrp1	Sdf2l1	Ahdc1
Cyp46a1	Gm11266	Col6a1	Clcf1	Map3k8	Kmt2c
Naprt	C030037D09Rik	Cldn15	Crocc	Tcf7l2	Setd1b
Pgc	Gm23547	Hmgn2	Mill2	Lrrc45	Higd1a
