# Supplementary material for: Analysis of the Reversible Impact of the Chemodrug Busulfan on Mouse Testes
Source: Cells. 2021 Sep 13;10(9):2403. doi: 10.3390/cells10092403 (PMC8472455; doi:10.3390/cells10092403)
Supplement: Supplementary file 1 [file cells-10-02403-s001.zip › cells-1315888_Supplementary Material/Thirouard_Tables S2.xlsx]

## Sheet: S1a-2
Npy4r	Rpl13a	Pmaip1	S100a3	Depdc7	Thyn1	2700099C18Rik
Ces2e	Gm8199	Cdca5	Tubb6	Rad51	Melk	2610044O15Rik8
Ly6c1	Fam26e	Kif20b	Foxm1	Knl1	Kif15	AC129328.1
Dusp4	Perp	Fosl1	Tubb5	Cdc25b	Anln	Slc2a9
Ly6a	Rspo3	Sgo2a	Dbf4	Knstrn	Grhl3	Slfn3
Ccl9	Cox7a2l	Serpinb8	Cse1l	Mcm8	Tacc3	Ms4a10
Serpinb9b	Mmp24	Nek2	Kif20a	Tpx2	Dtl	Pnliprp2
Aldh3a1	Rps3a1	Mcm10	Nqo1	Ect2	Rtkn2	Casq2
Ankrd1	Glipr2	Mastl	Asf1b	Gpsm2	1700066M21Rik	Nppb
Dcxr	Slc19a2	1700007K13Rik	Cdc20	Sass6	Sccpdh	Cgref1
Cd14	Rpl37	Kif18a	Gmnn	Iqgap3	Fanci	Mylpf
Emp1	S100a13	Nusap1	Syngr3	Smc2	Neil3	Ltf
9530053A07Rik	Rps8	Bub1	Oit3	Zfp37	Exo1	Mslnl
Gna14	Gm8730	Aurka	Abca1	Ndc1	Bub1b	Gm11223
Aqp3	Rpl23	Fam83d	Gadd45b	Rad54l	Pclaf	Gpr85
S100a7a	Fndc10	Ccna2	Brca1	Stil	Siah1b	Slc29a4
Gsto1	Mt2	Depdc1a	Mybl2	Cdca8	Kif14	Defb42
Lamb3	Slc37a2	Kif2c	Chtf18	Cenpa	Clspn	1700003M07Rik
Fgf13	Svop	Abcb1b	Fbxo5	Ereg	Tuba1c	Gm17655
Plet1	Mab21l3	Aass	Sgk1	Chek2	Cdc25c	9430037O13Rik
Acta2	Sec14l5	Tuba8	Mdm2	Mad2l1	Cenph	Gria3
Anpep	Eda2r	Ddias	Nfyb	Rad18	Ticrr	Def6
Cd24a	Gen1	Cenpu	Txnrd1	Rad51ap1	Mis18bp1	Tbc1d8
Nipal1	Spag5	Robo3	Pttg1	Blm	Fancb	Hspb1
1110038B12Rik	Kifc5b	Mcam	Tubd1	Synm	Sephs2	Tek
Gdf15	Polq	BC030867	Ppm1d	Aen	Syt12	Cct4
Adgrf4	Arhgap11a	Gna15	Rrm2	Arl6ip1	Haspin	Snrpb2
Rps20	Cdca2	Lrr1	Top2a	Kif22	Hyls1	Hyal1
Rps27l	Wnt4	Ska1	Vcan	Plk1	Ercc6l	Rdm1
Eva1c	Tigit	Tubb4b	Cenpk	Mki67	Tnfaip6	Mrpl32
Ecscr	Cdc6	Dlgap5	Ska3	Cenpi	Hmgb2	Hebp2
Rpl39	Pimreg	Cdkn3	Esd	Mak16	Fam72a	Nudcd2
Rps10	Ccnb2	Ckap2	Pbk	Gins3	Ier5	Jpt1
Col14a1	Ube2c	Zfp365	Gtse1	Cenpn	Espl1	Dnaaf2
Duoxa1	Spc25	Ttk	Mis18a	Mmp15	Tubb2a	Efcab11
Cyp2b10	Nectin4	Prc1	Racgap1	Mns1	Zfp958	Dcaf4
Prr7	Kif11	Eme1	Cdkn1a	Kif23	Nsl1	Trip13
Mettl7a3	Ncapg	Atf7ip2	Poc1a	Gclc	Tubb4a	Fst
Alox5ap	Birc5	Ccnb1	Cdca3	Zwilch	Bub3	Dnajc9
Tubb3	Cdk1	Tubb2b	Dusp1	Traip	Spdl1	Diaph3
4930471E19Rik	Mtfr2	Cenpe	Incenp	Srxn1	Fv1	Eif3e
Dram1	Ccng1	Frat2	Fam111a	C330027C09Rik	Ccnf	Ly6e
Dglucy	Hmmr	Ckap2l	Cep55	Ttf2	Ang	Rfc4
Nme4	Prr11	Kif18b	Plk4	Aspm	Tuba1a	Pros1
Cyp2c55	Aurkb	Spn	Bard1	Fancd2	Spc24	Cbr3
Spint1	Cenpp	Nrg1	Tuba4a	Kif4	Slc4a11	Thbs2
Rps3	Depdc1b	Oip5	Ube2t	Trim59	Gas2l3	Pigf
Phlda3	Esco2	Rprm	Cenpf	Brip1	Cenpw	Rps14
Ctla2a	Shcbp1	Aunip	Suv39h2	Smc4	Kifc1	Fas
Cd109	Cenpq	2010110K18Rik	Nuf2	Ncaph	Haus3	Crcp
Gm6030	Sgo1	Gm36401	Cenpl	Nup37	2810408I11Rik	Stk17b
Ethe1	Ndc80	Cdc45	Sapcd2	Parpbp	9230114K14Rik	Irf6
Phospho2
Eif3m	Slfn2
Fabp5	5430403G16Rik
Exosc9	Osgin1
Tlr2	Smim26
Polr1e	Arrdc3
Prdx1	Rad54b
Stmn1	Zfp429
Rcc1	Gm14681
Lzic	Gm20667
Triap1	Zfp960
Mphosph10	Zfp850
Ap1s2
Vps36
Mfap3l
Tbc1d9
Ccsap
Abhd10
Reep4
Tmem5
Celf5
Trim13
Calm2
Cib2
Rpf2
Ephx1
Myl6b
Rbm48
Pitpnc1
St8sia4
Gfer
Rpl7
Tnfaip8l1
Cxcr4
Dlk2
Mlf1
Fam212b
Fam241a
Ubald2
Insl6
Nat2
Zfp472
Glipr1
Zfp729b
Ube2s
Ei24
Arhgap22
Vrk2
Syt11
Zfp874a
Tmem19
Nanos1
